# Supplementary material for: Incompletely solvated ionic liquid mixtures as electrolyte solvents for highly stable dye-sensitized solar cells
Source: Royal Society of Chemistry journal article supplement (doi:10.1039/c2ra22330a), 2012-11-21
Supplement: c2ra22330a.pdf [file c2ra22330a.pdf]

# **Incompletely Solvated Ionic Liquid Mixtures as Electrolyte Solvents for Highly Stable Dye-Sensitized Solar Cells**

Ze Yu<sup>a</sup>, Nick Vlachopoulos<sup>b</sup>, Anders Hagfeldt<sup>b</sup> and Lars Kloo<sup>a\*</sup>

<sup>a</sup>*Applied Physical Chemistry, Royal Institute of Technology, S-100 44 Stockholm, Sweden*

<sup>b</sup>*Physical Chemistry, Uppsala University, Box 259, S-751 05 Uppsala, Sweden*

## Supporting Information

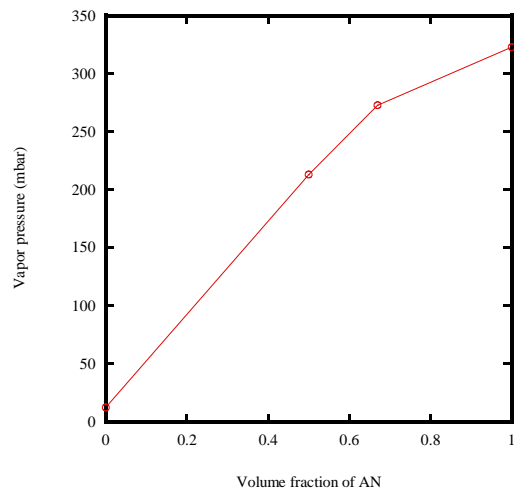

a)

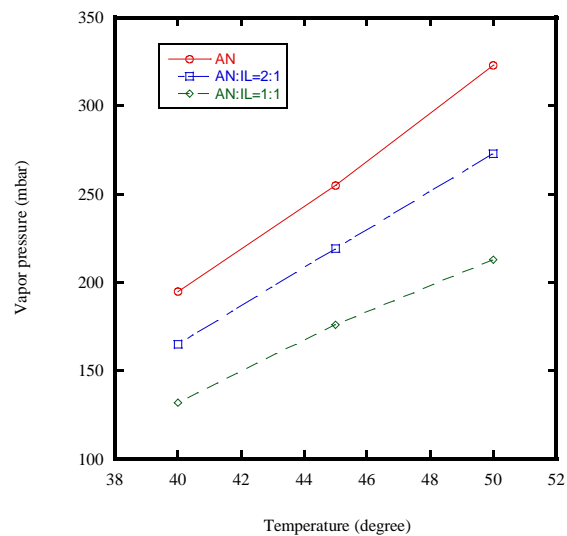

b)

Figure S1. a) Vapor pressure for the solvents of electrolyte AN, ISILM-1, ISILM-4 and IL measured at 50 °C ; b) Vapor pressure measured at different temperatures for the solvents of electrolytes AN, ISILM-1 and ISILM-4.

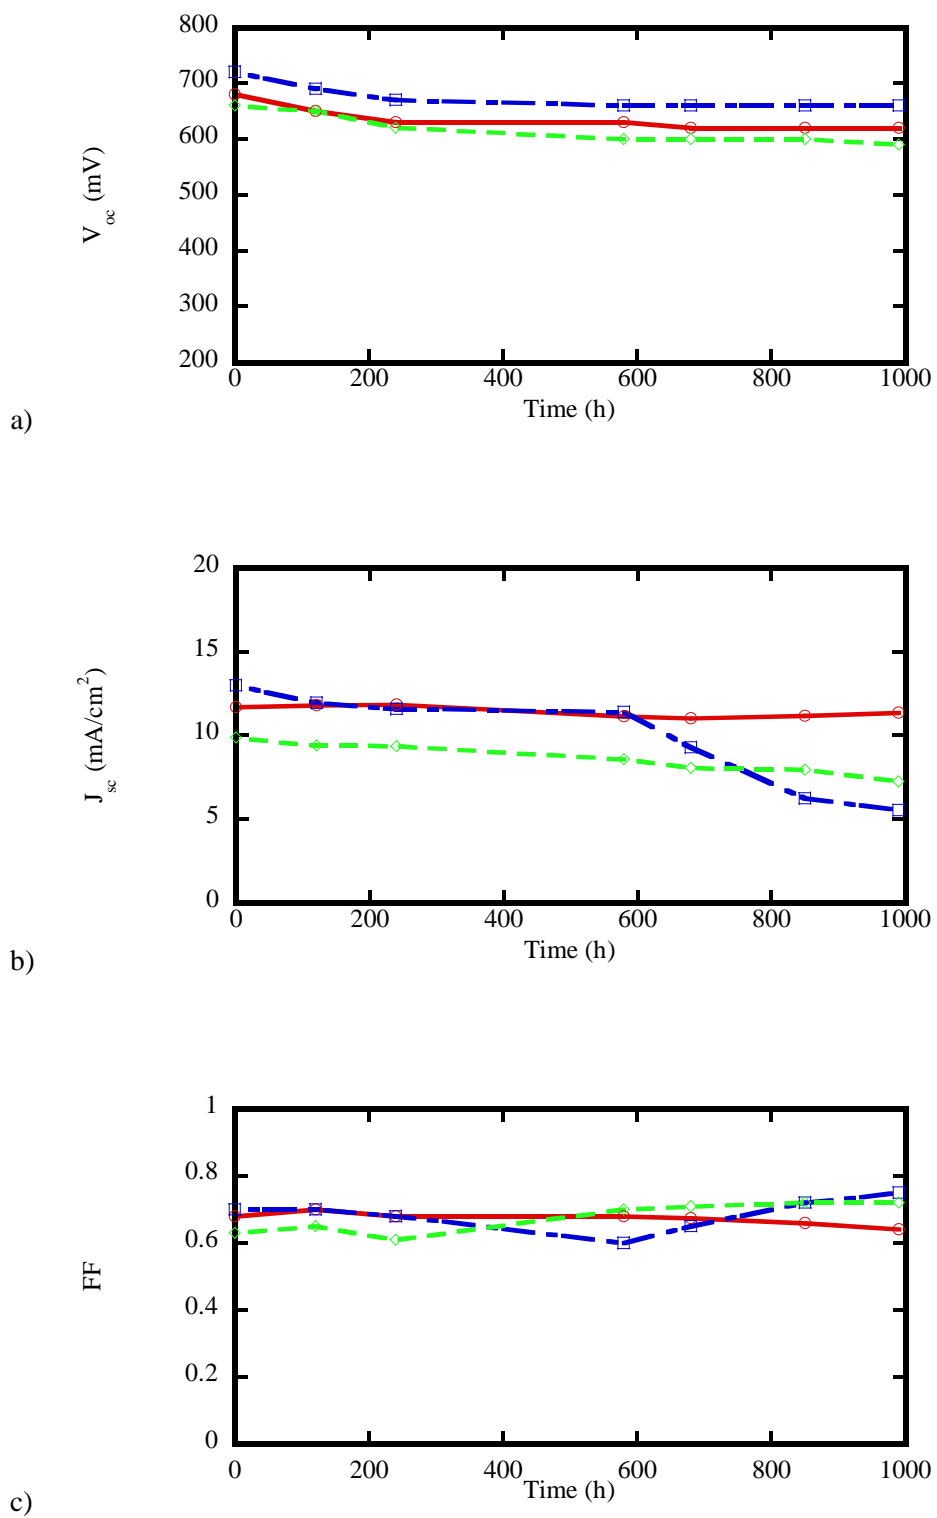

Figure S2. Evolution of the photovoltaic characteristics with time for DSCs based on electrolytes AN (blue), ISILM-4 (red) and IL (green) under illumination for 1000 hours.
